# Supplementary material for: Eco-Evolutionary Feedbacks and the Maintenance of Metacommunity Diversity in a Changing Environment
Source: MDPI journal article supplement (doi:10.3390/genes11121433), 2020-11-28
Supplement: s1 [file s1]

trait  $x$

a)  $\sigma_\alpha = 0.68, x_0 = -2$

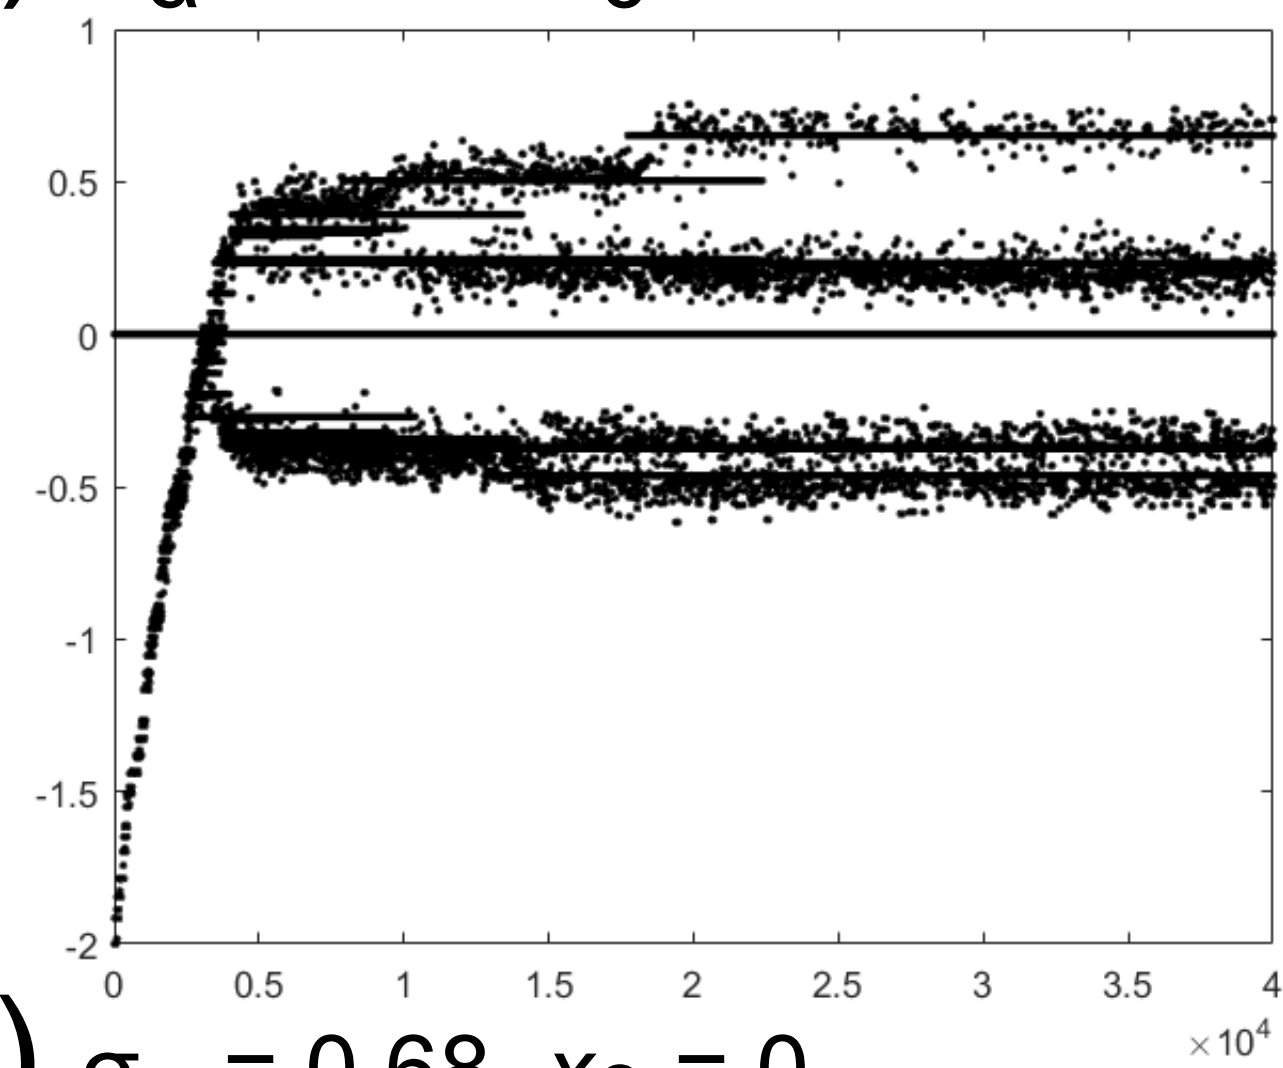

b)  $\sigma_\alpha = 0.68, x_0 = 0$

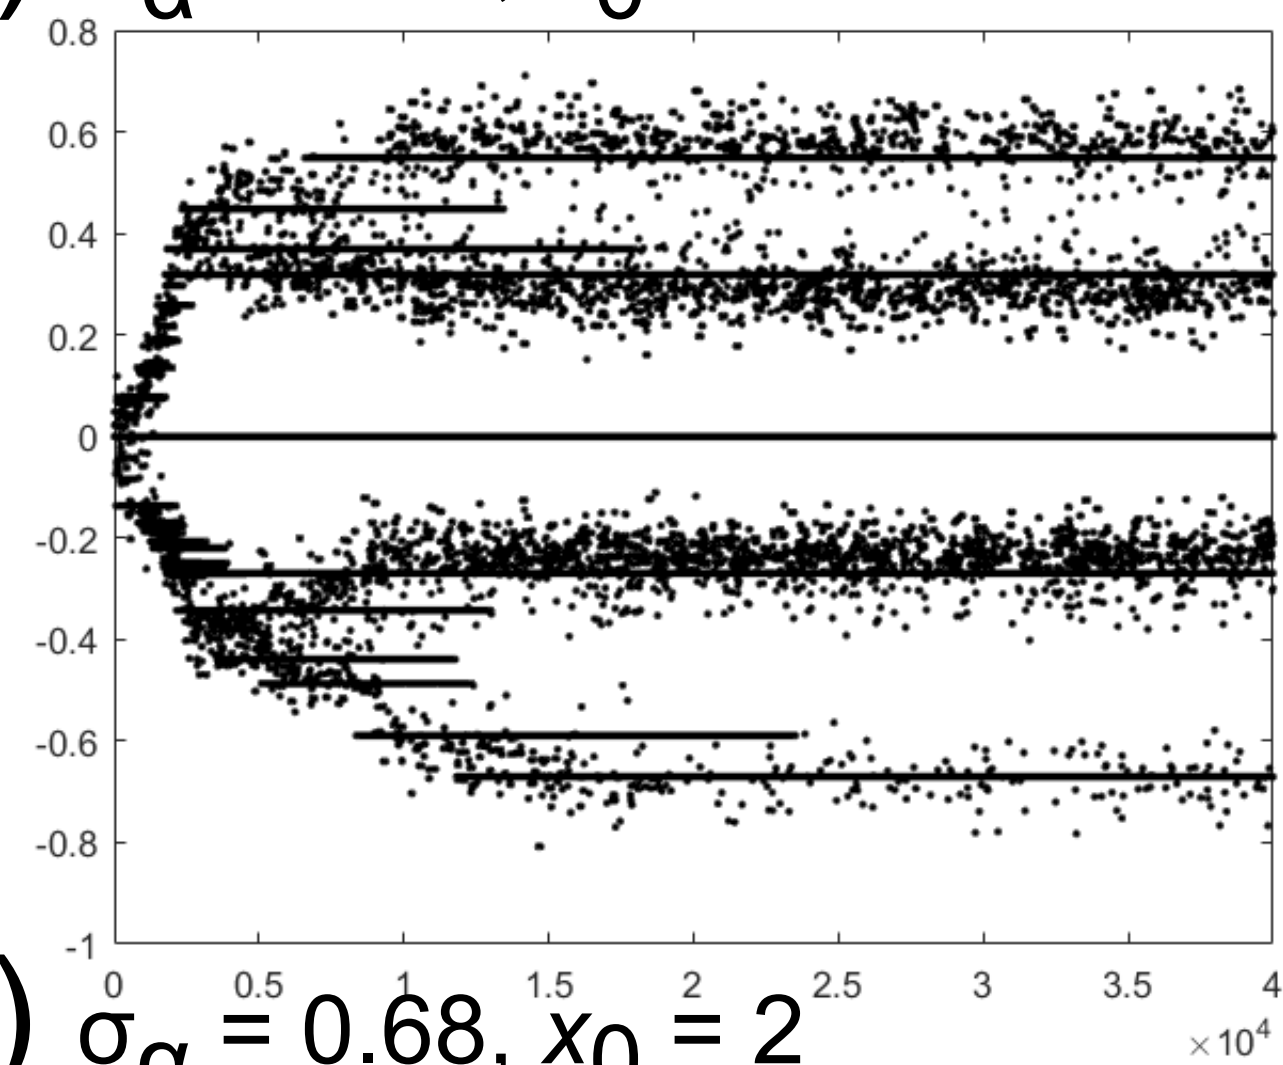

c)  $\sigma_\alpha = 0.68, x_0 = 2$

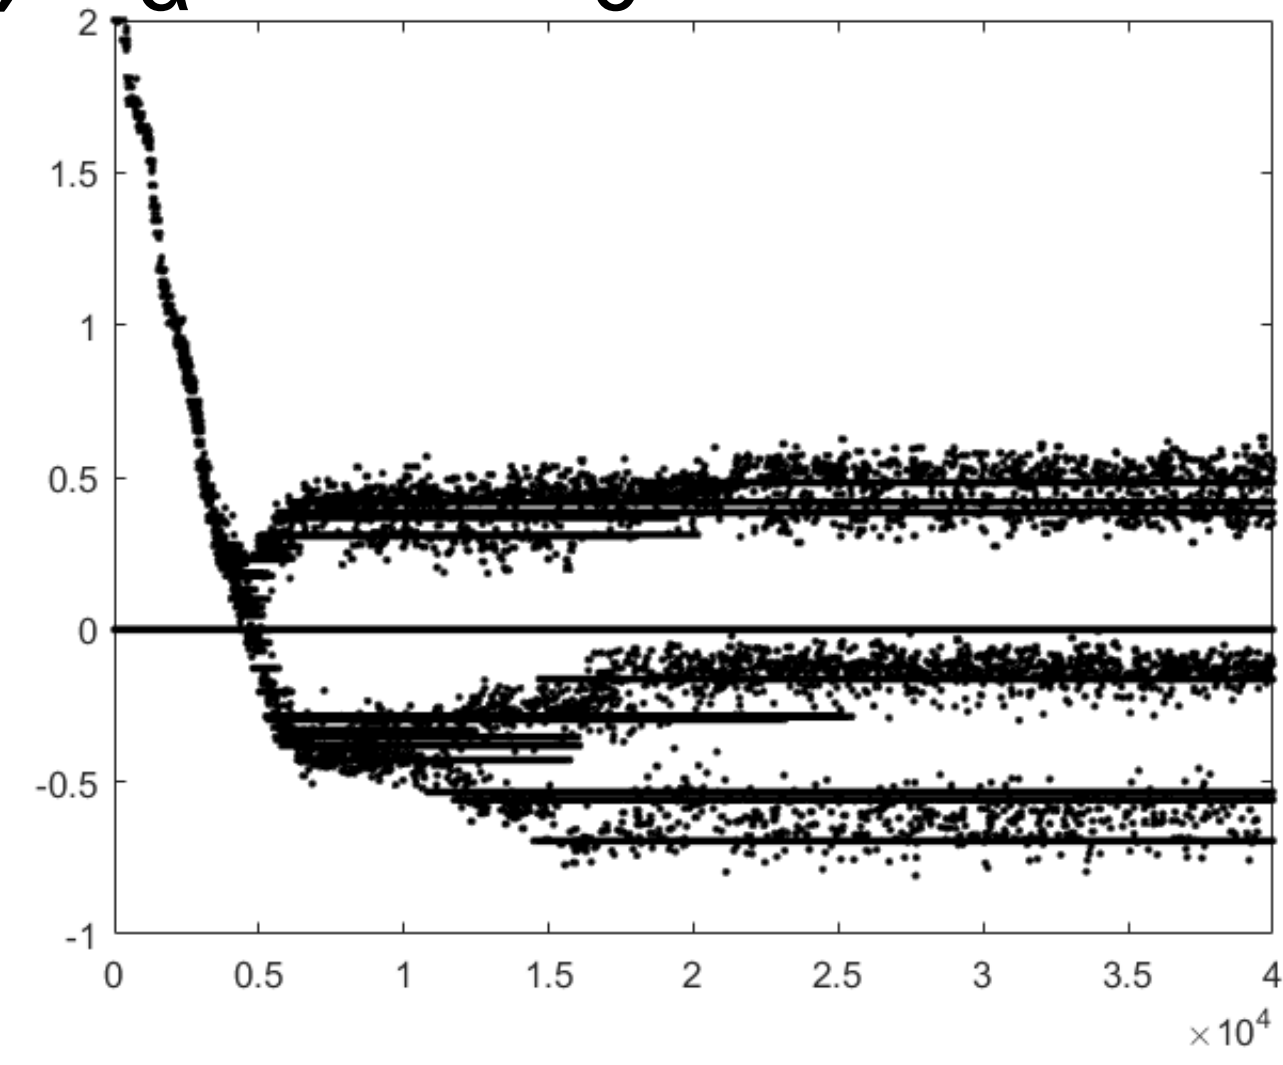

d)  $\sigma_\alpha = 0.85, x_0 = -2$

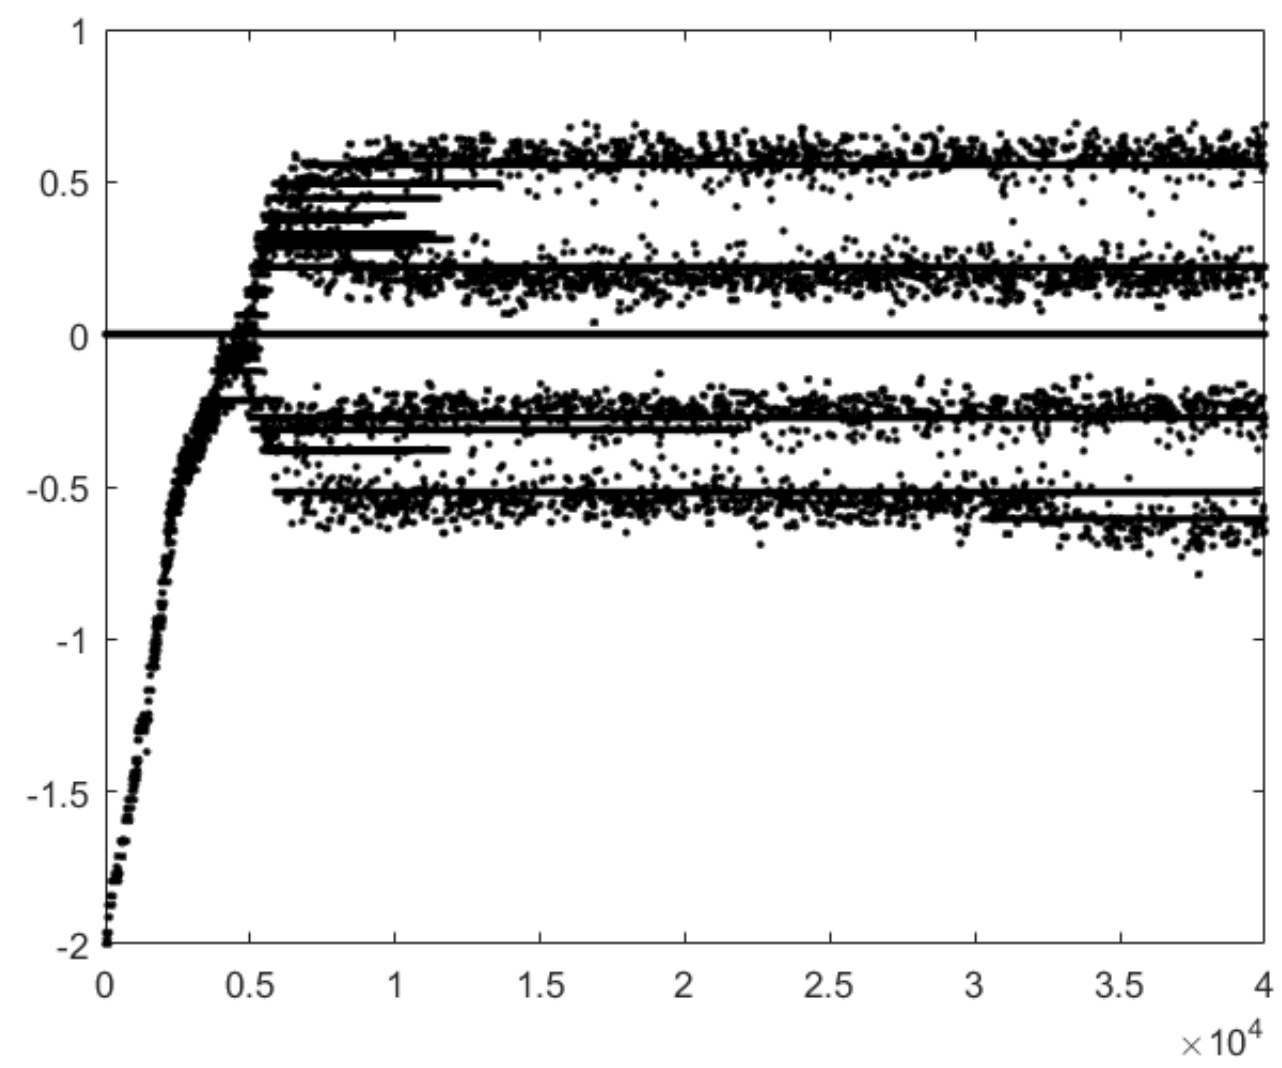

e)  $\sigma_\alpha = 0.85, x_0 = 0$

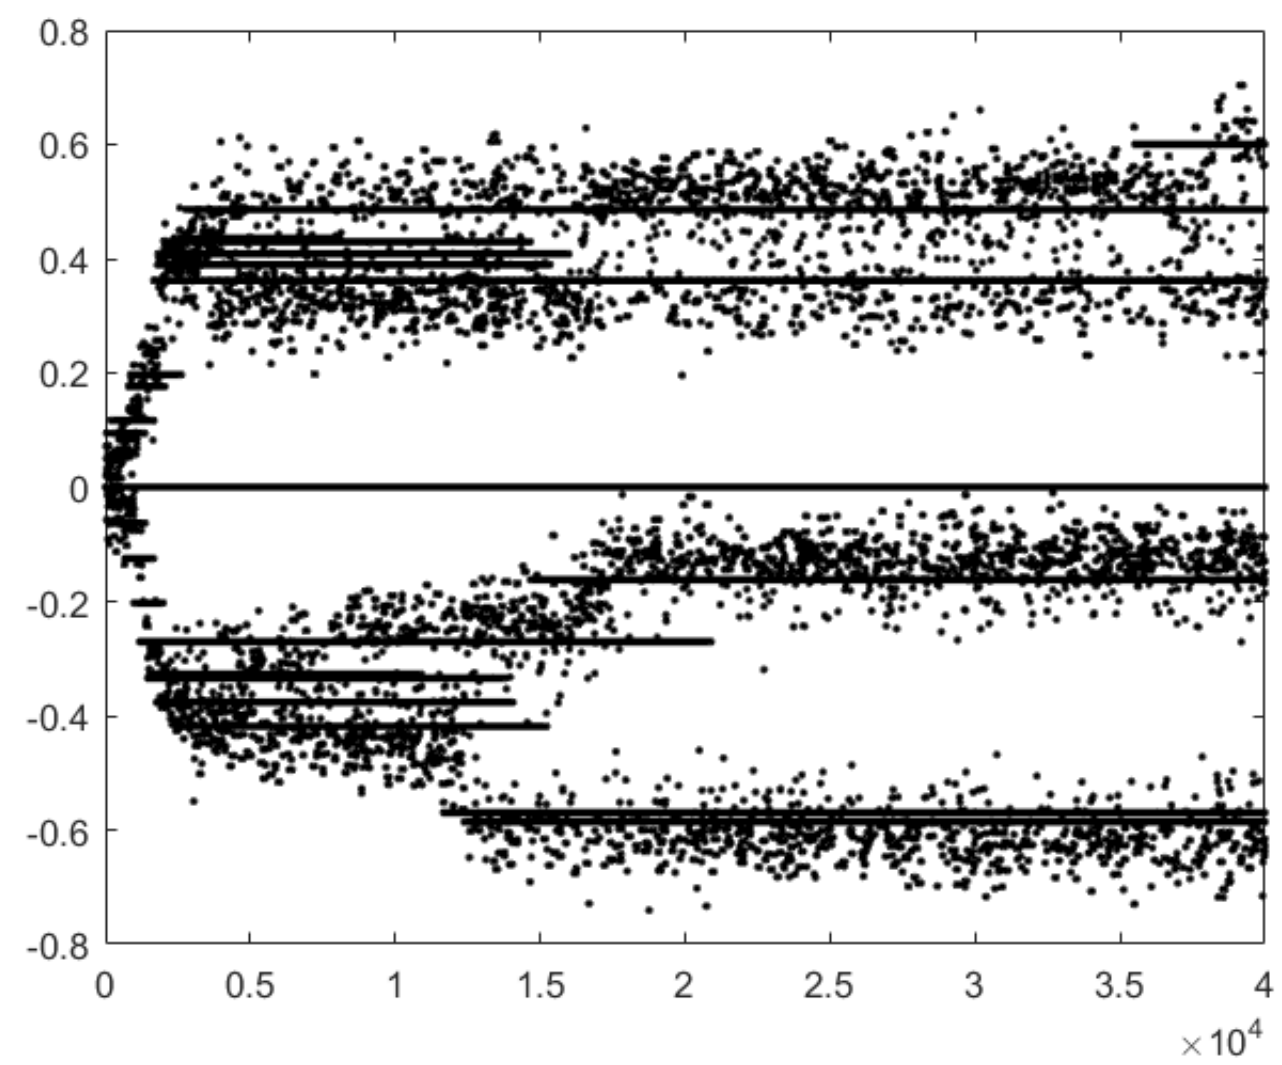

f)  $\sigma_\alpha = 0.85, x_0 = 2$

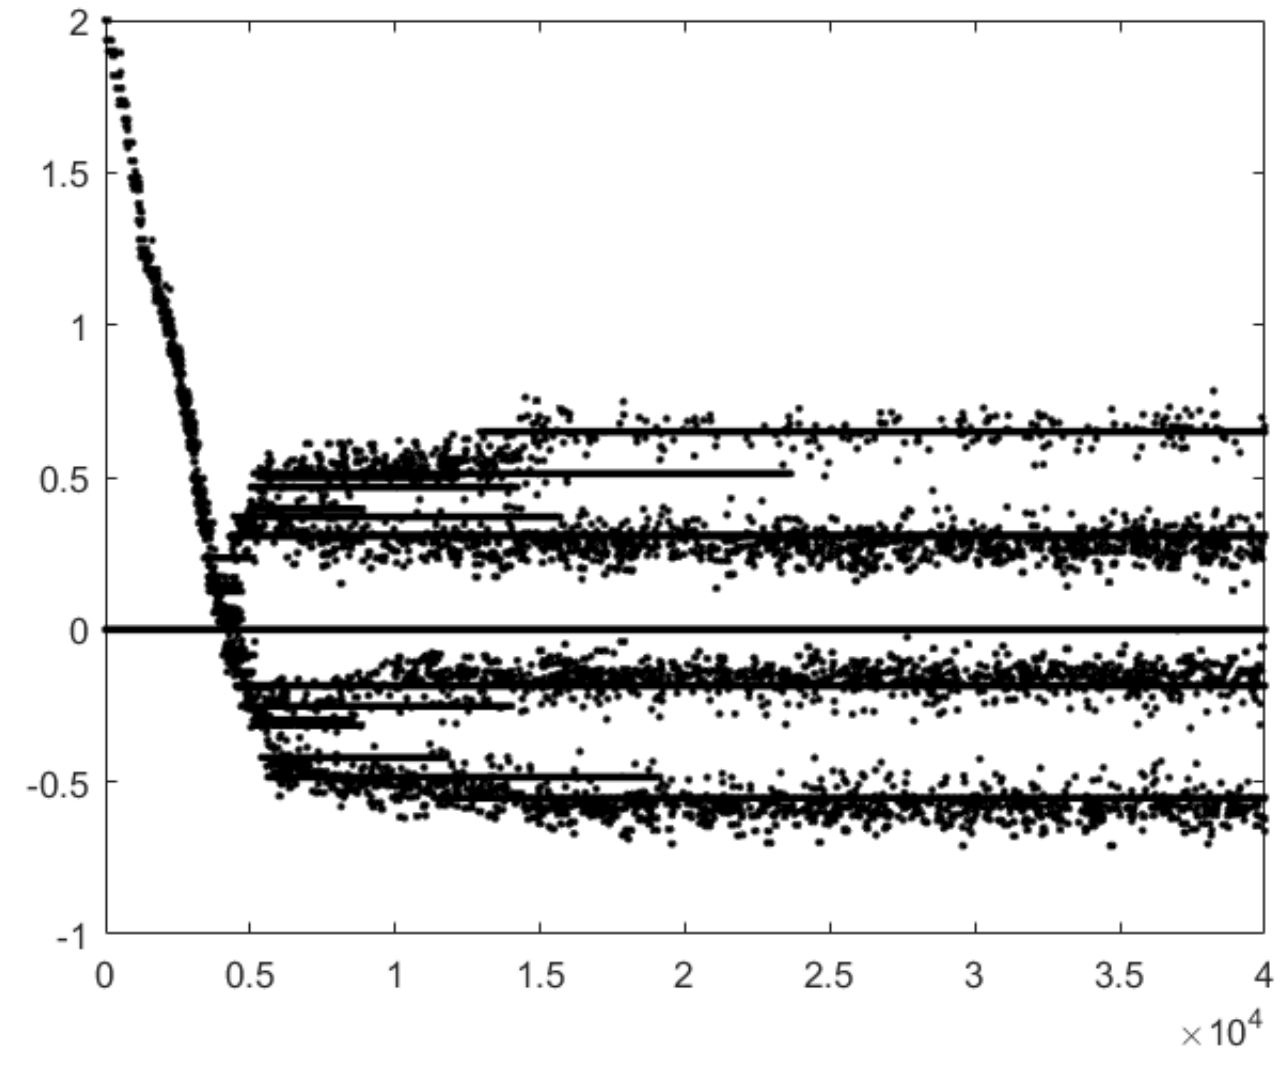

h)  $\sigma_\alpha = 1.5, x_0 = -2$

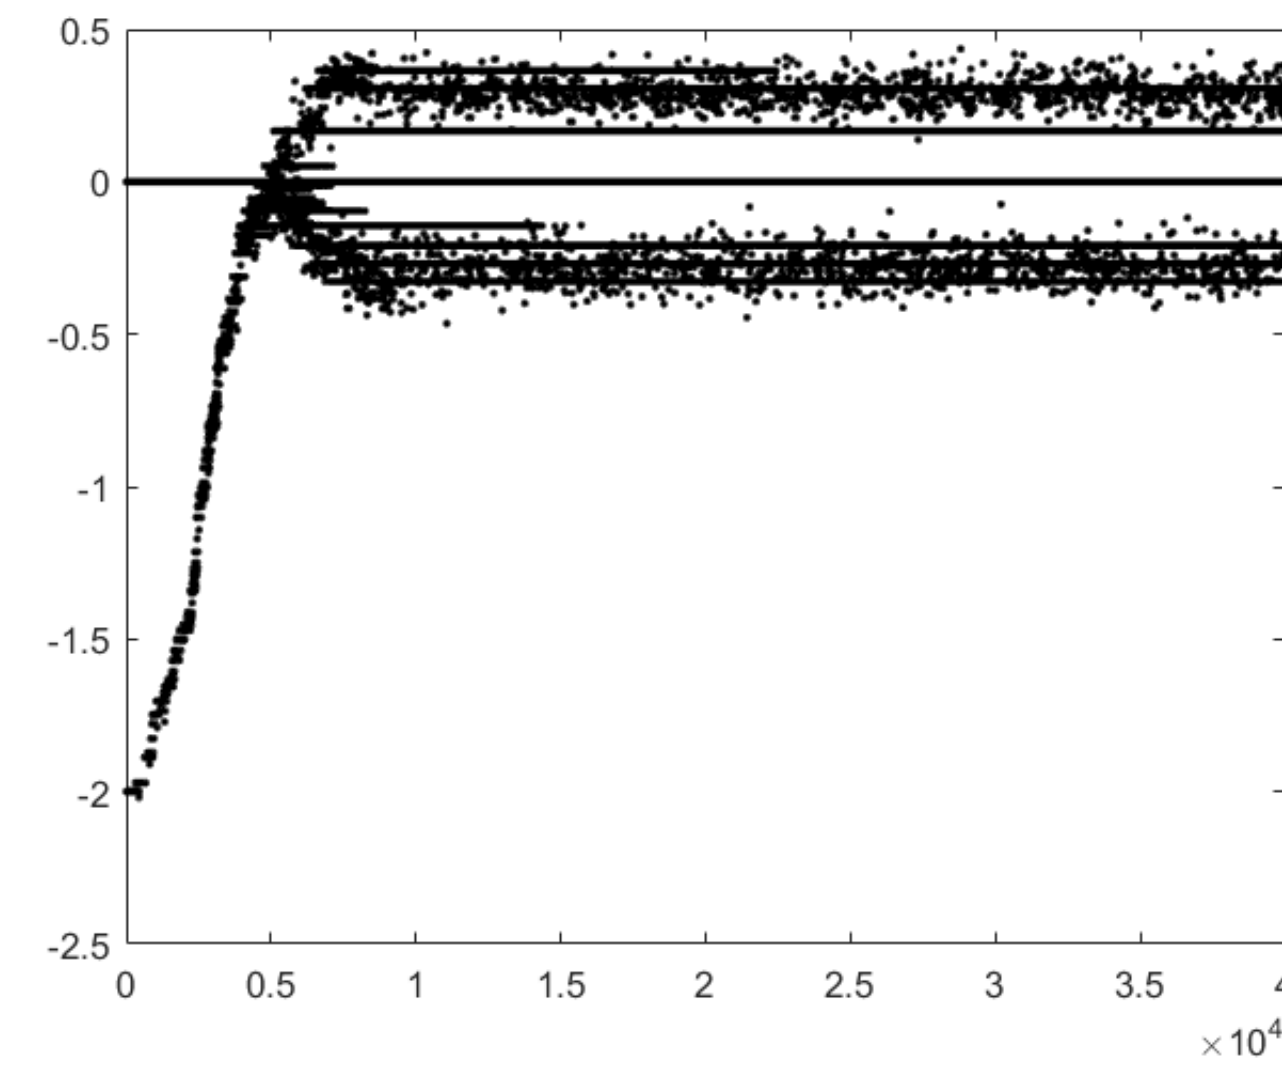

i)  $\sigma_\alpha = 1.5, x_0 = 0$

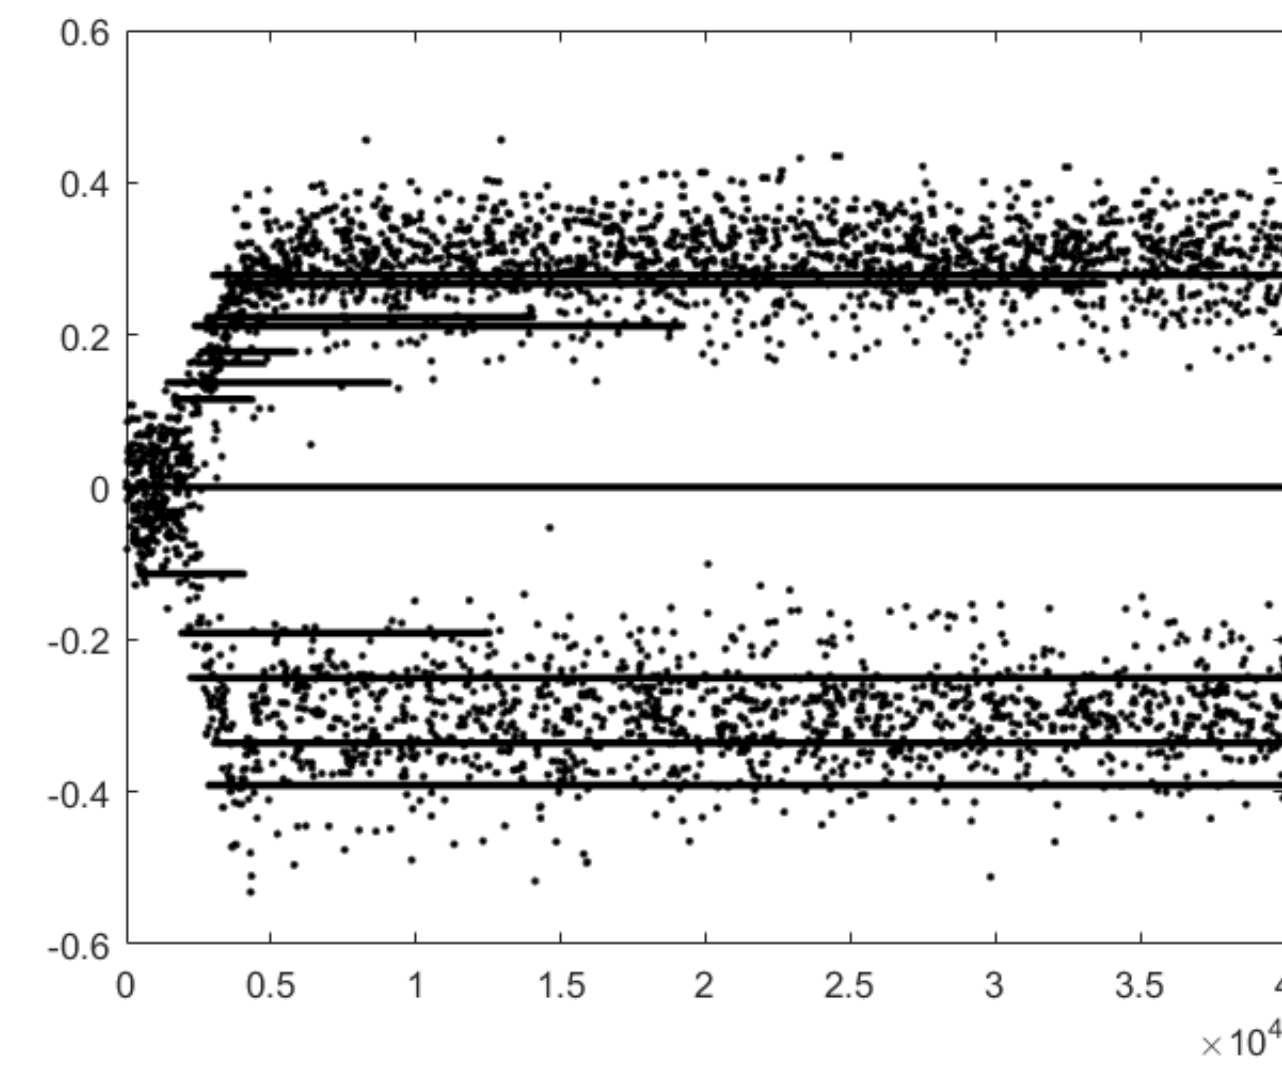

j)  $\sigma_\alpha = 1.5, x_0 = 2$

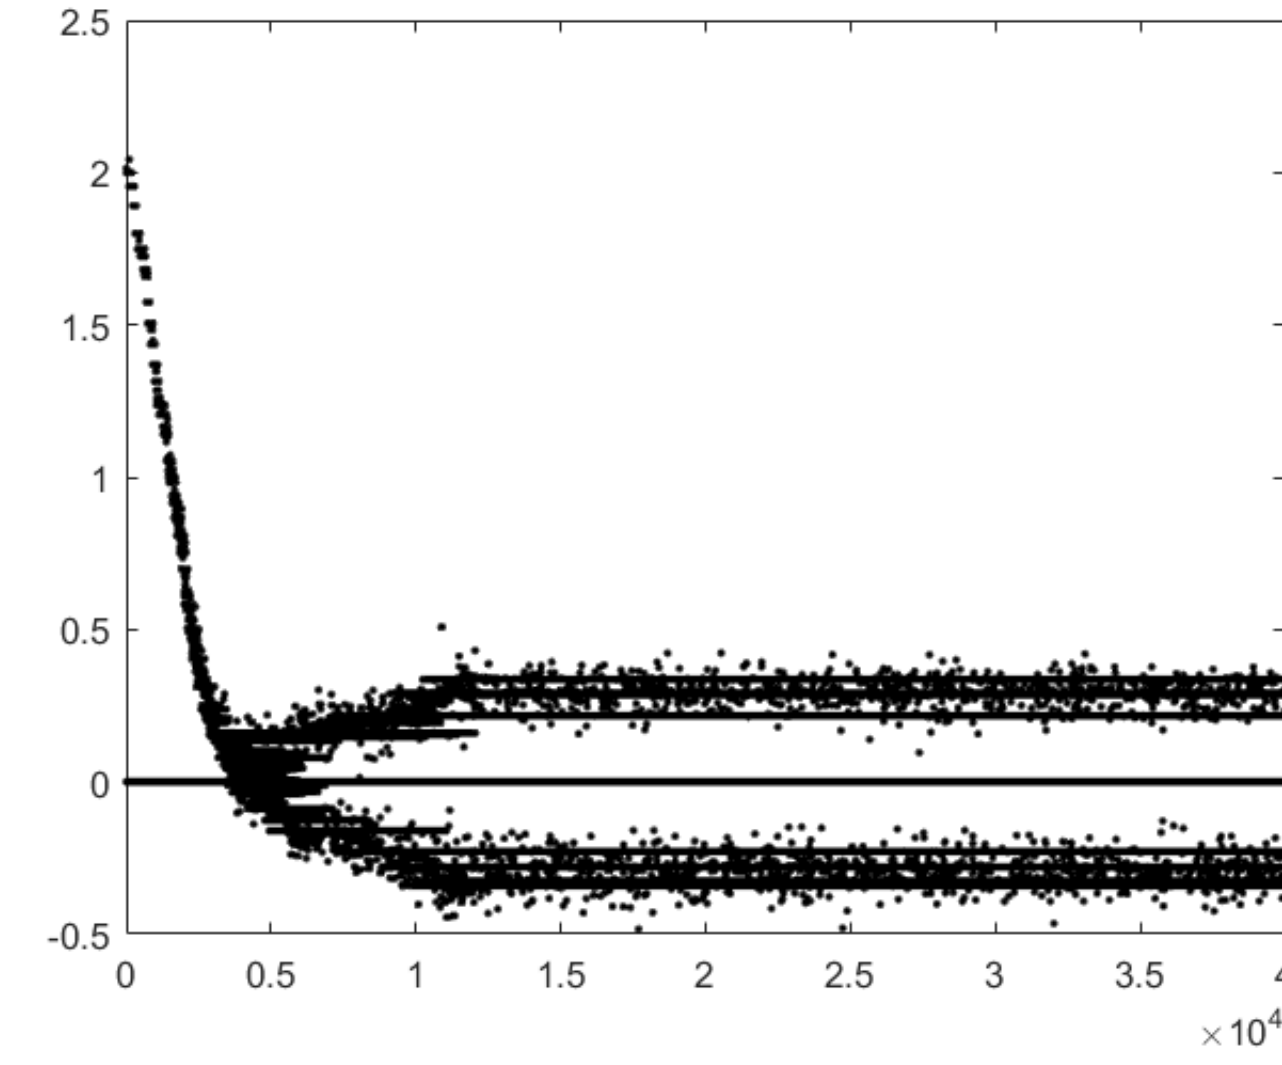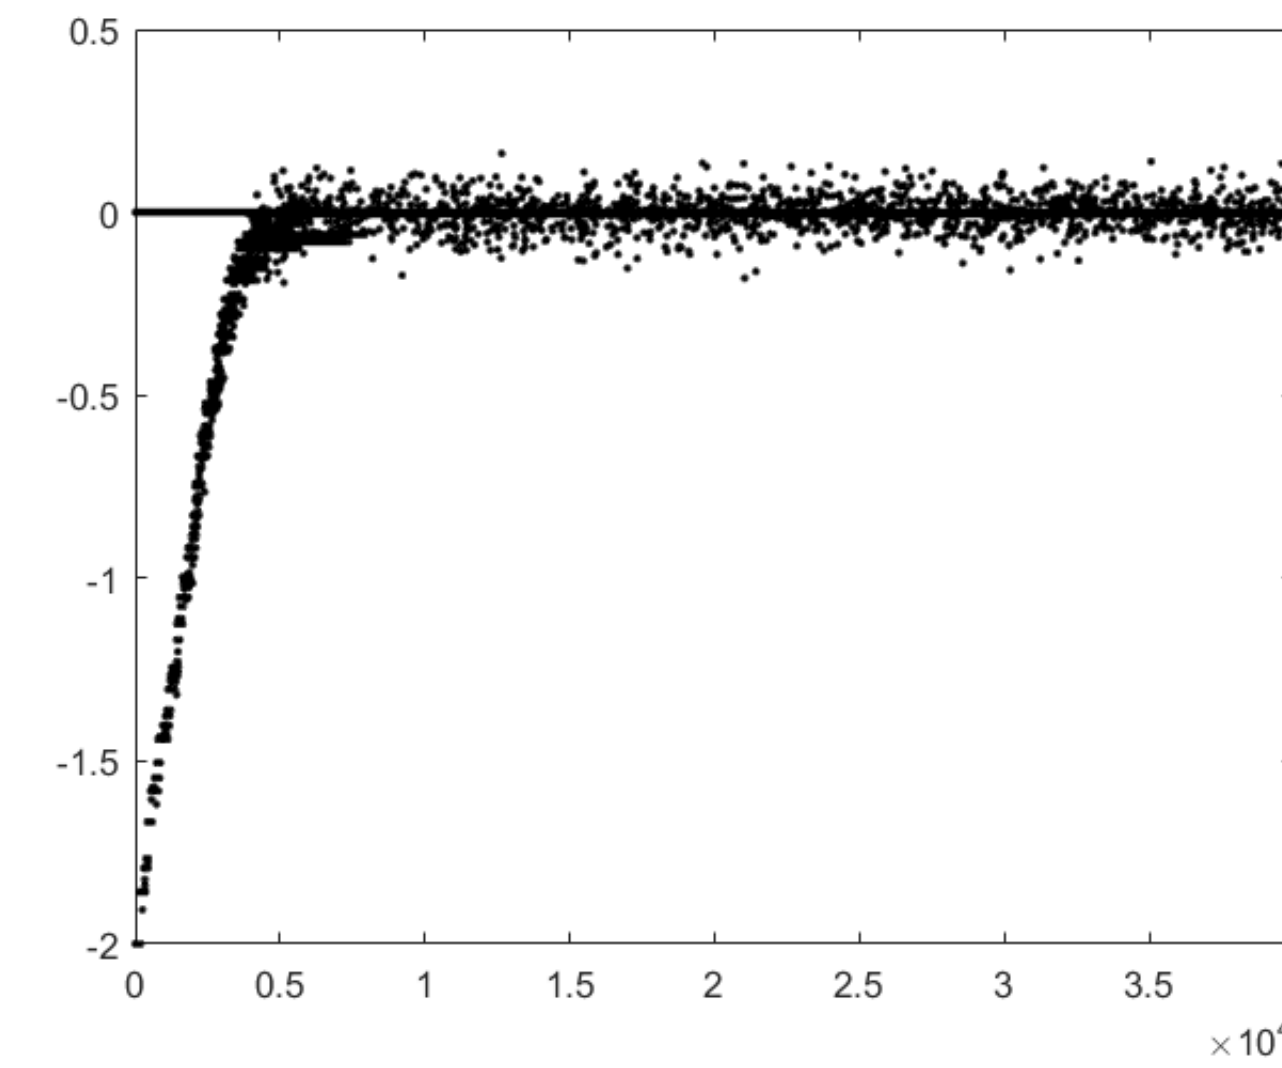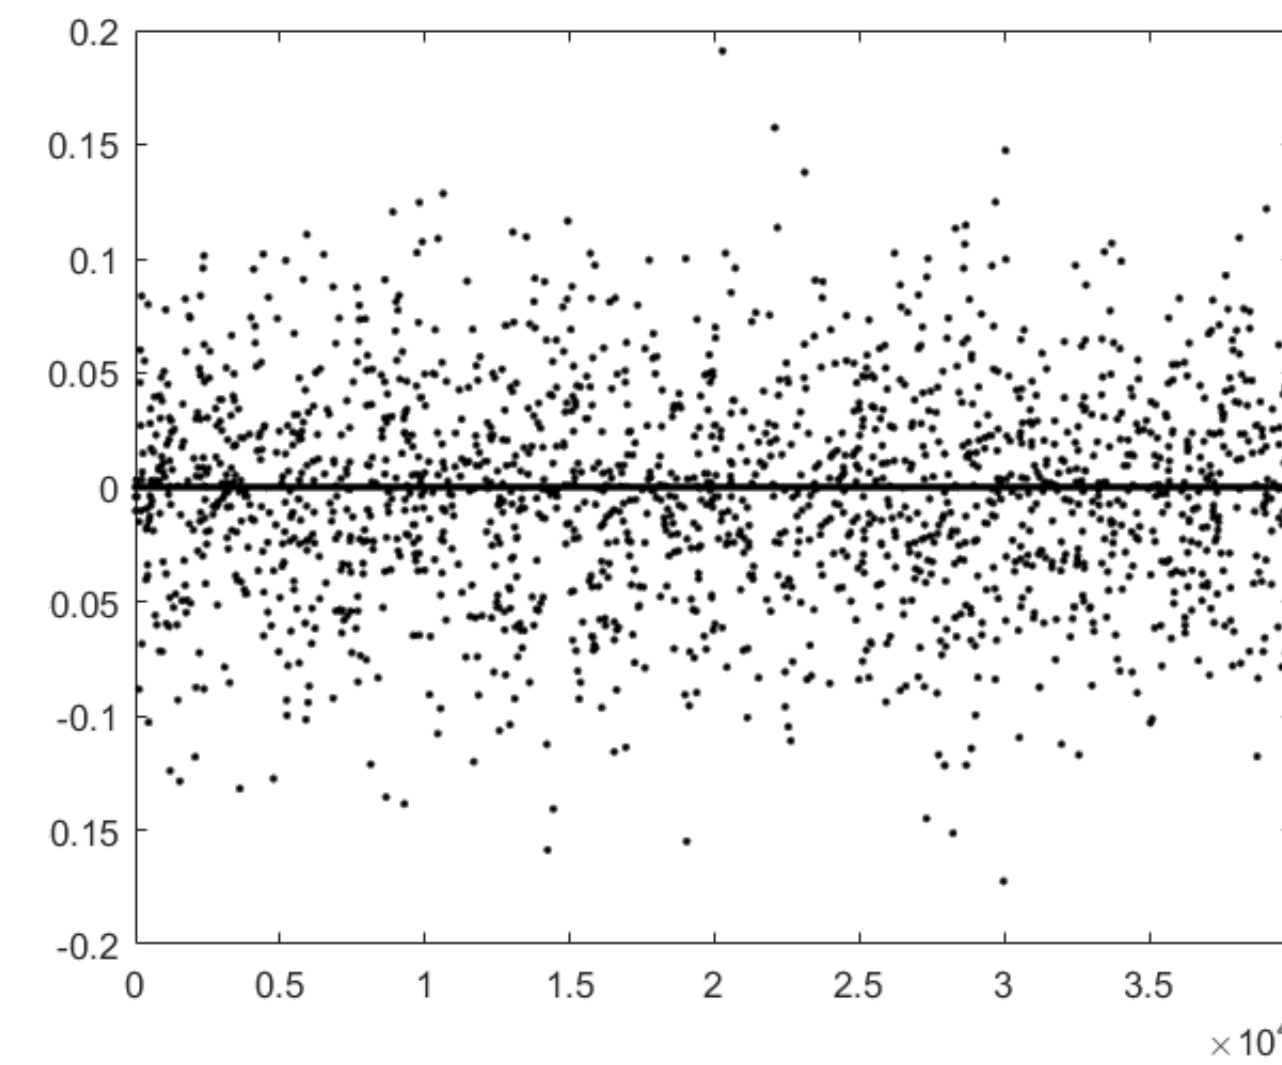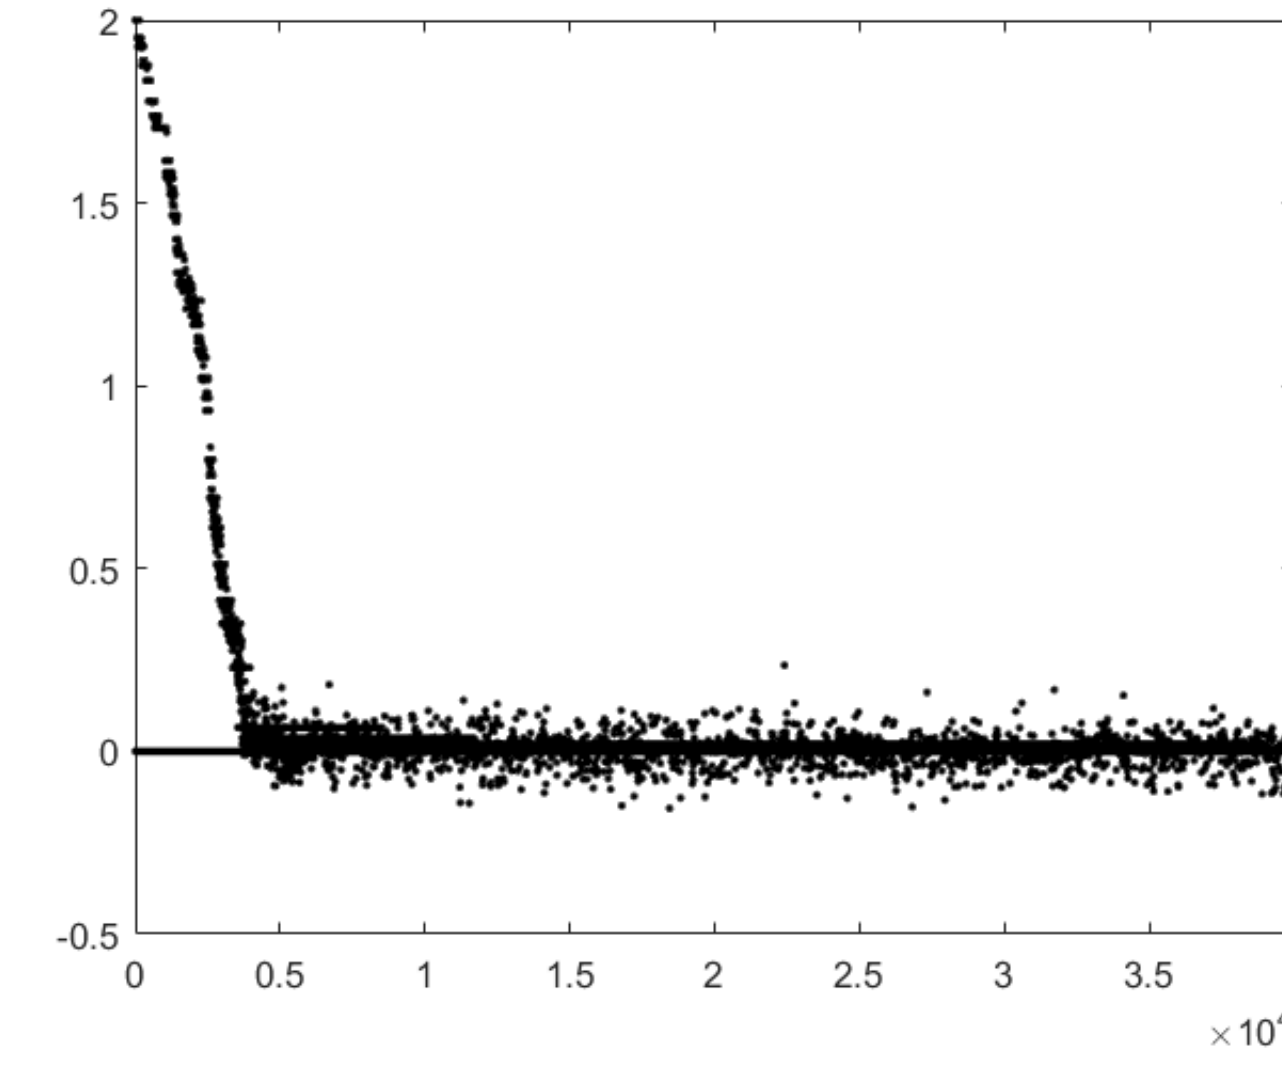

time
