# Supplementary material for: Eco-Evolutionary Feedbacks and the Maintenance of Metacommunity Diversity in a Changing Environment
Source: MDPI journal article supplement (doi:10.3390/genes11121433), 2020-11-28

$$\Delta=0$$

$$\sigma_{\alpha}=0.68, d=0$$
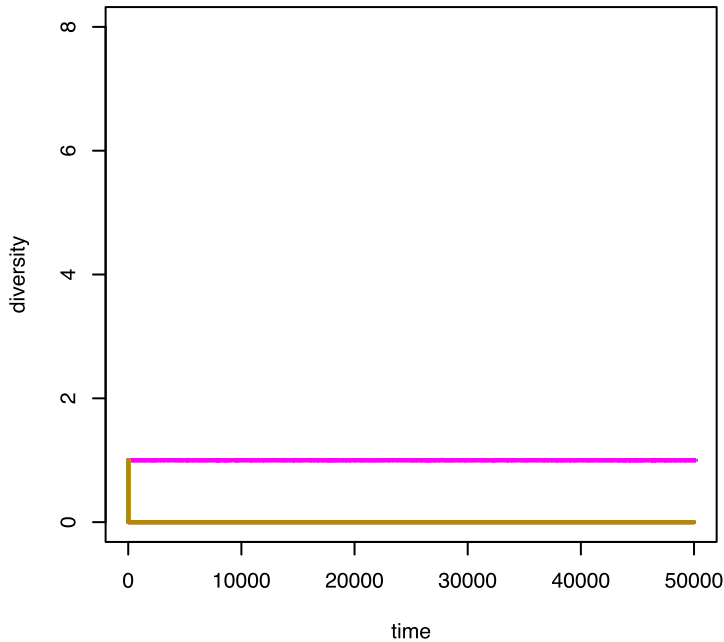

$d=0.01$

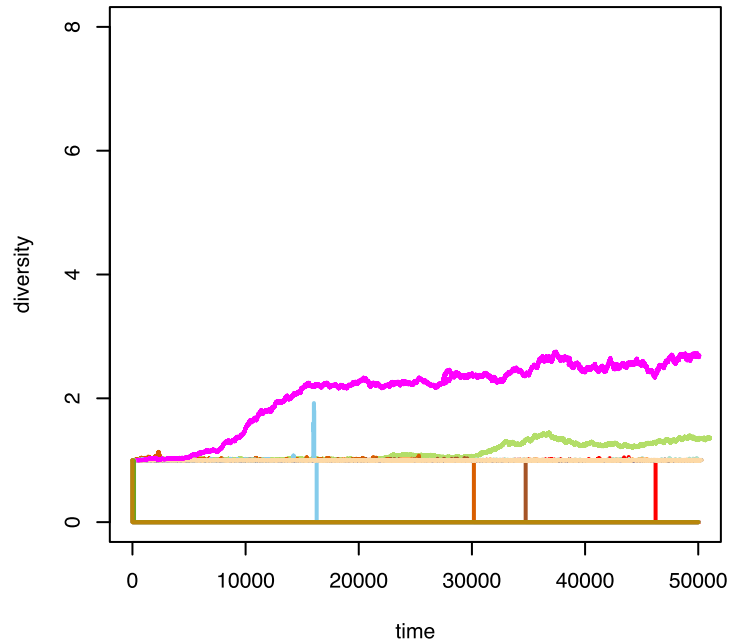

$d=0.1$

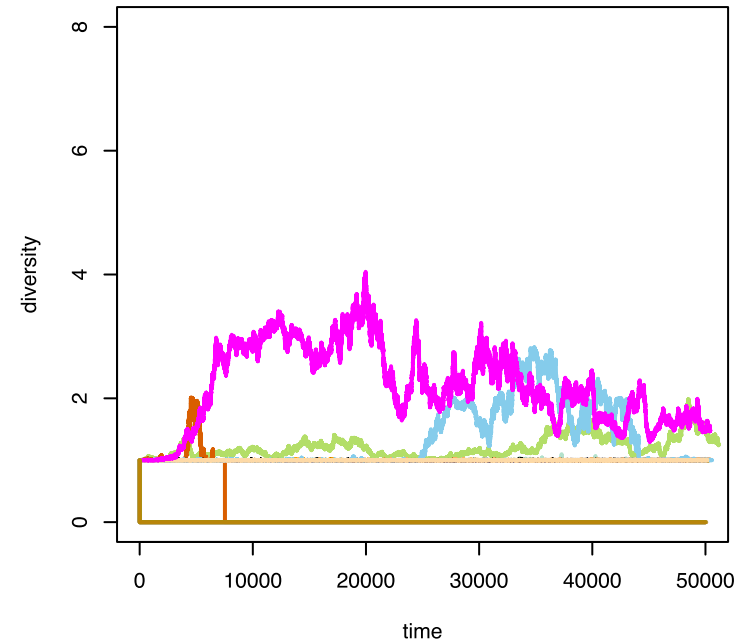
$$\Delta=10^{-5}$$
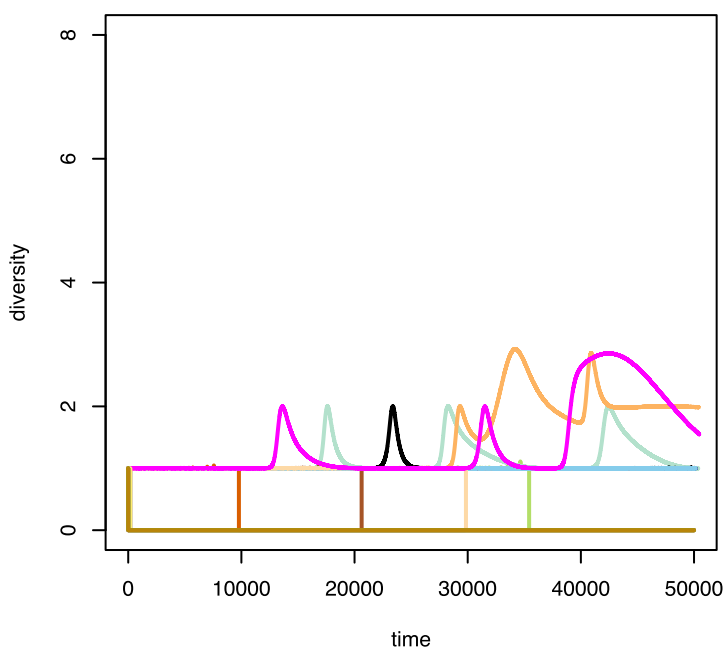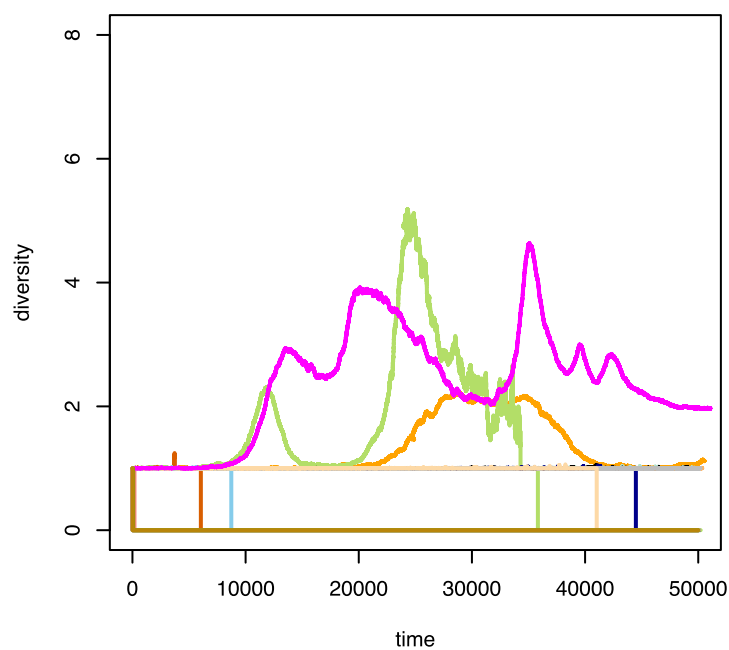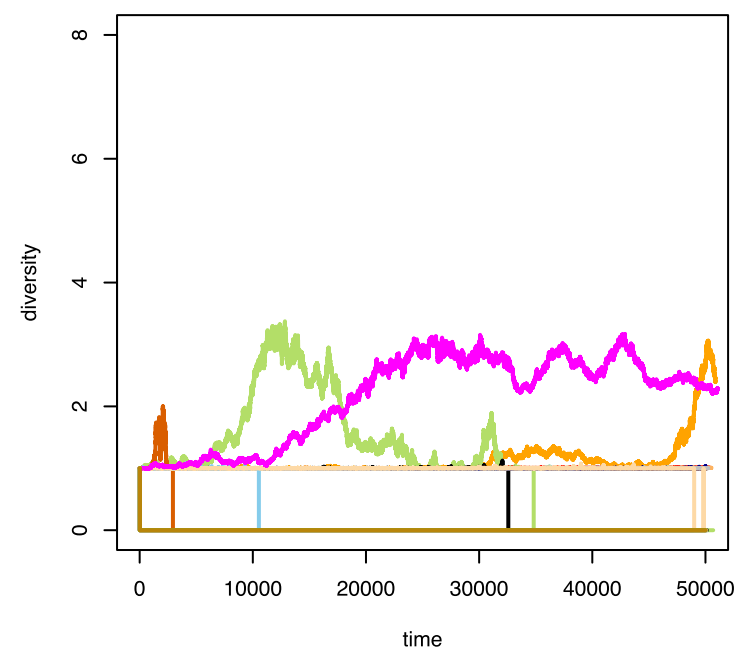
$$\Delta = 4.4 \times 10^{-4}$$
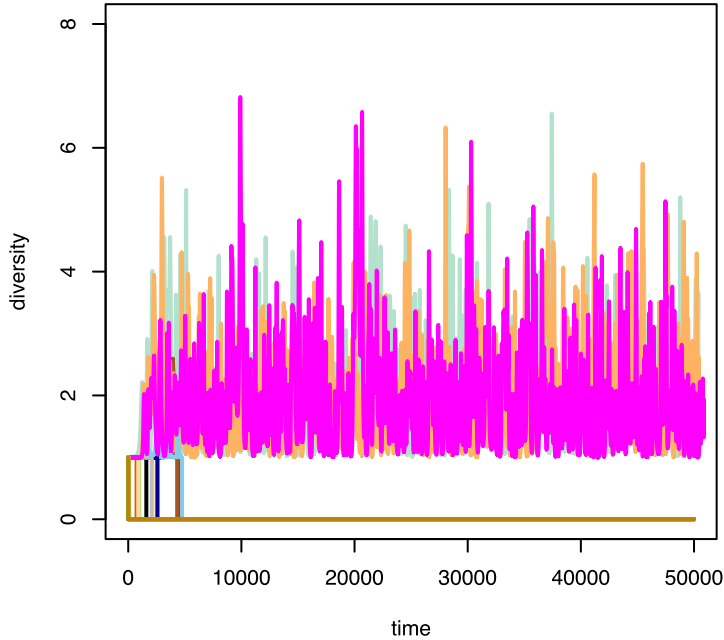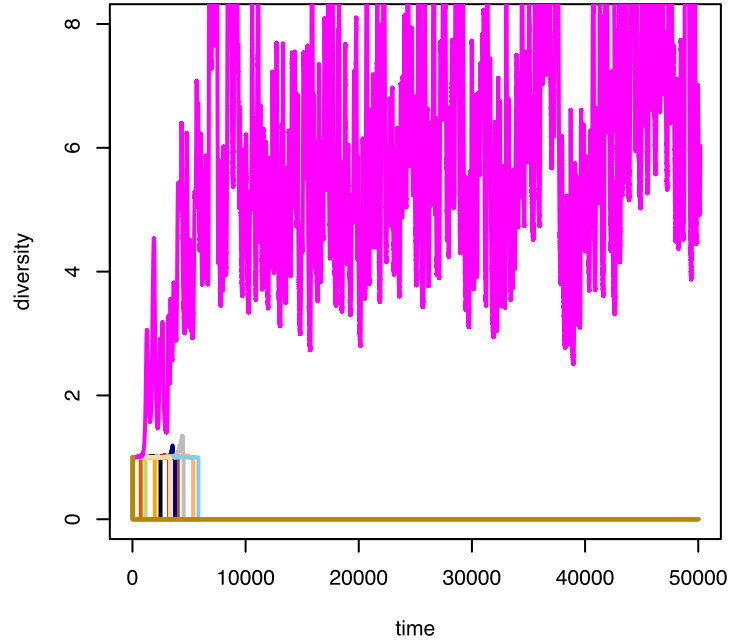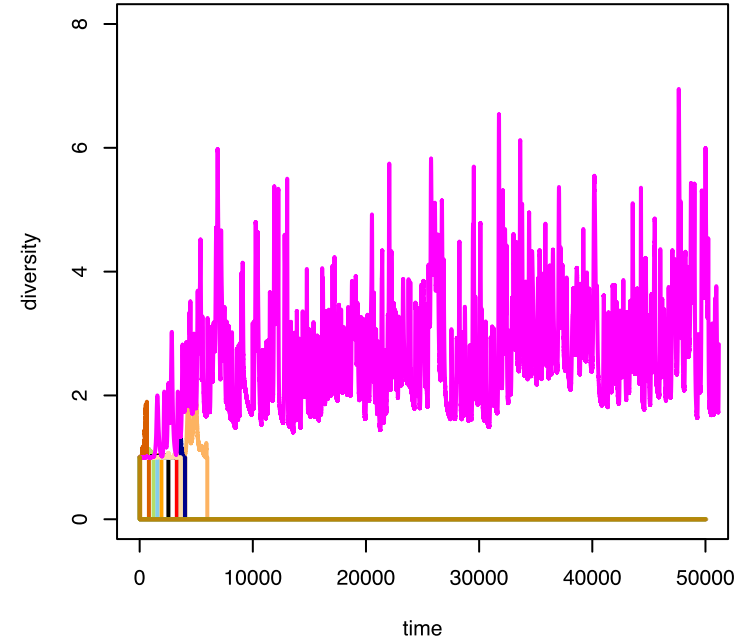

Supplement: s1 [file s1]
