# Supplementary material for: Eco-Evolutionary Feedbacks and the Maintenance of Metacommunity Diversity in a Changing Environment
Source: MDPI journal article supplement (doi:10.3390/genes11121433), 2020-11-28

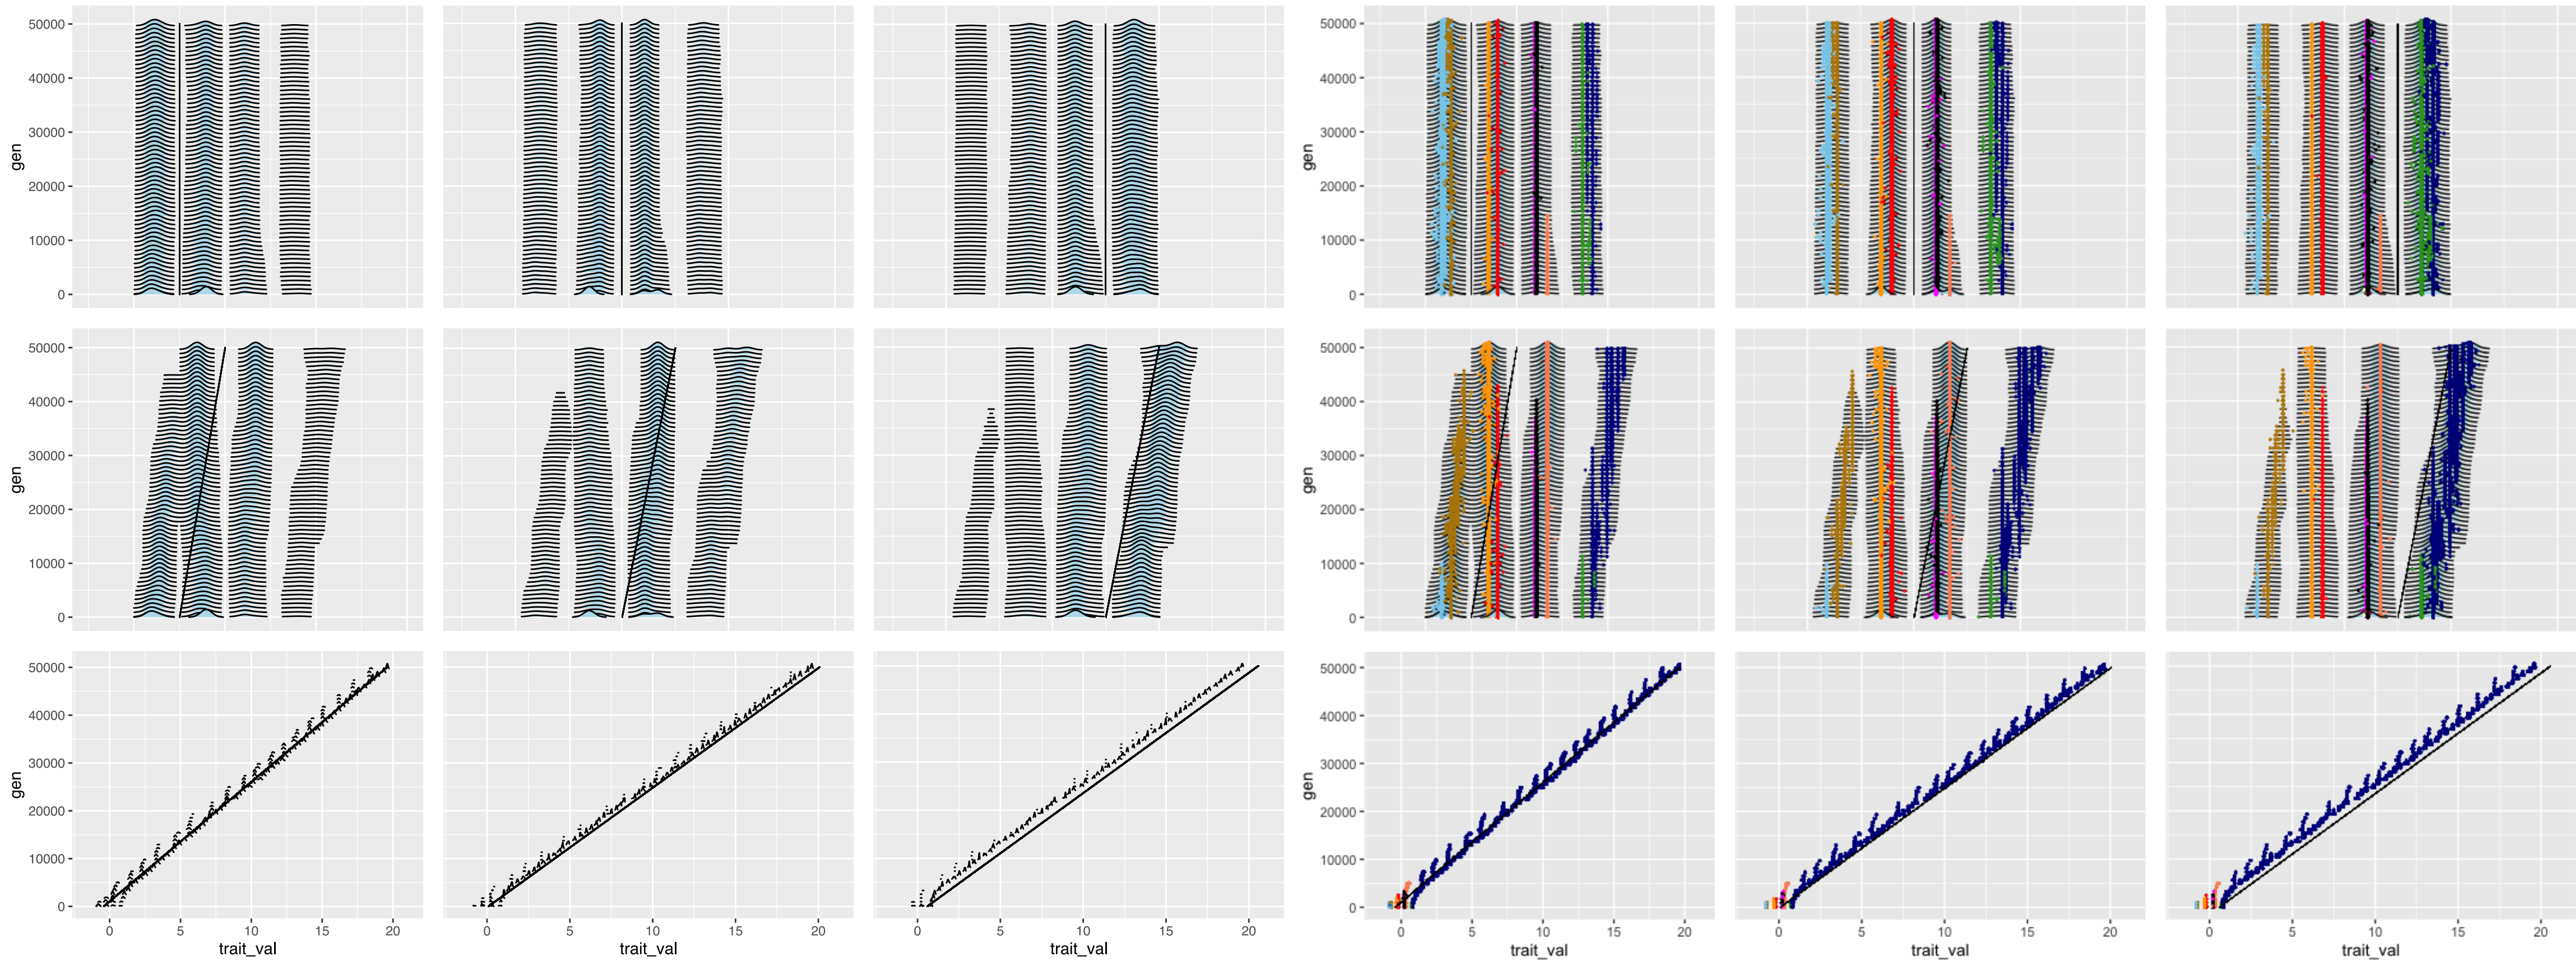

Supplement: s1 [file s1]
