# Supplementary material for: Eco-Evolutionary Feedbacks and the Maintenance of Metacommunity Diversity in a Changing Environment
Source: MDPI journal article supplement (doi:10.3390/genes11121433), 2020-11-28

$\Delta=0$   
 $\sigma_\alpha=0.68, d=0$

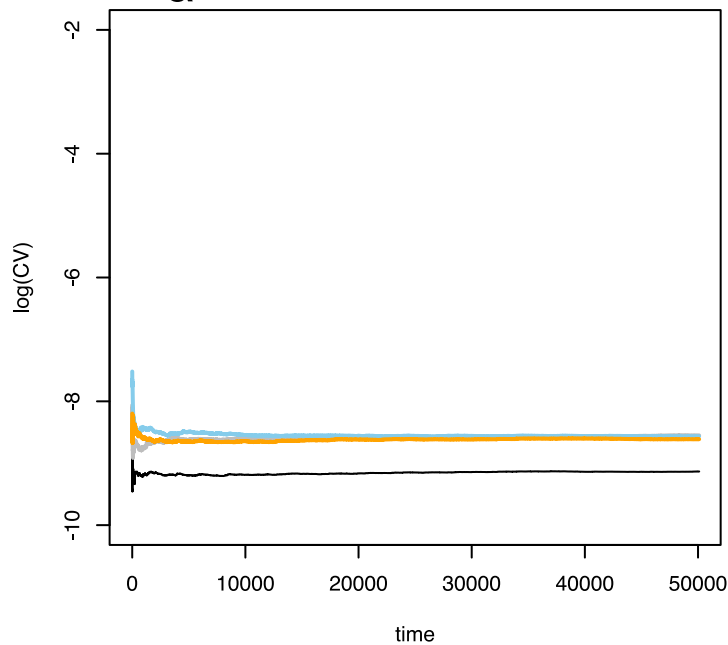

$d=0.01$

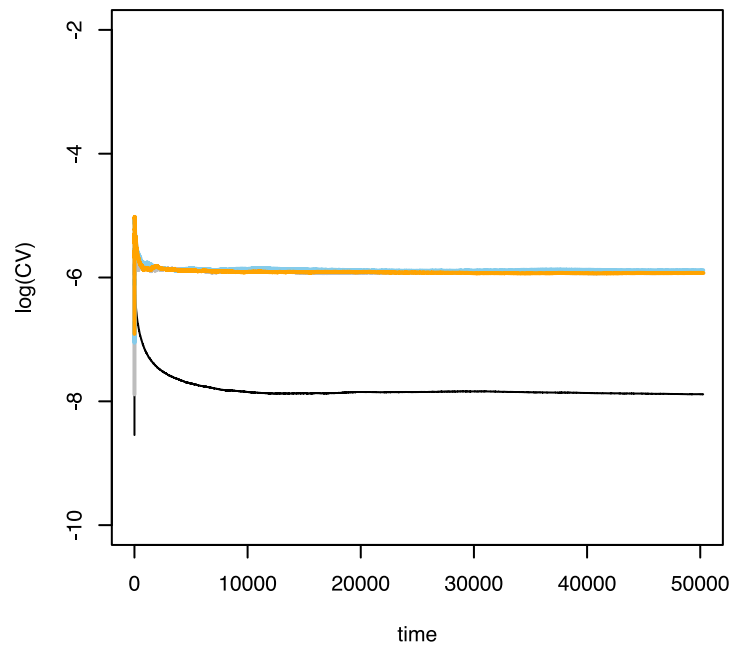

$d=0.1$

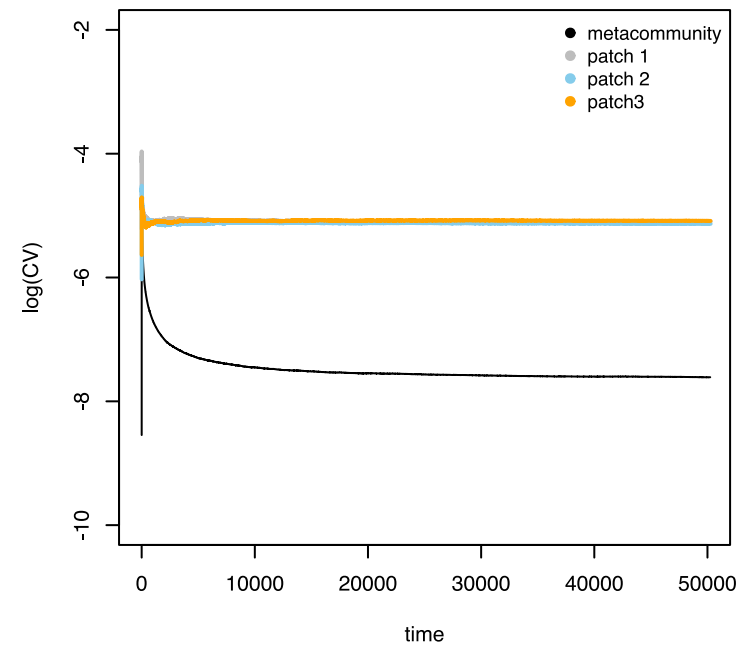

$\Delta=10^{-5}$

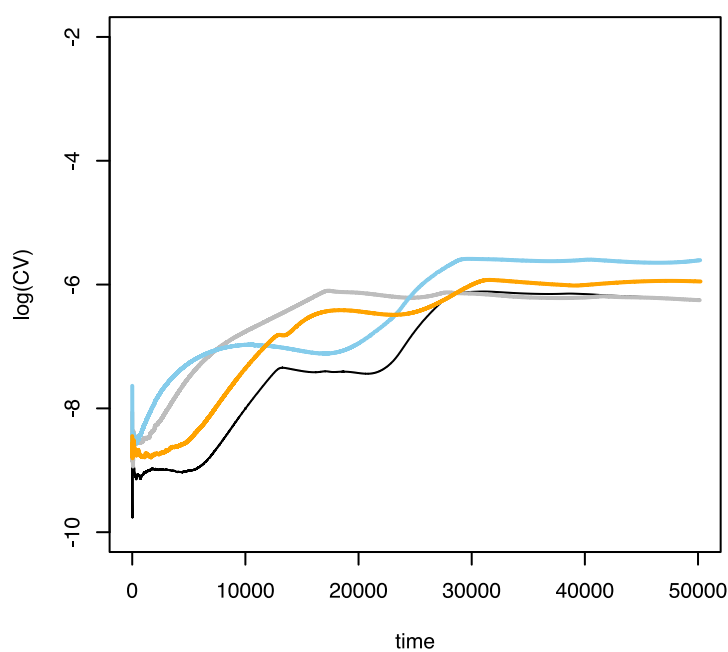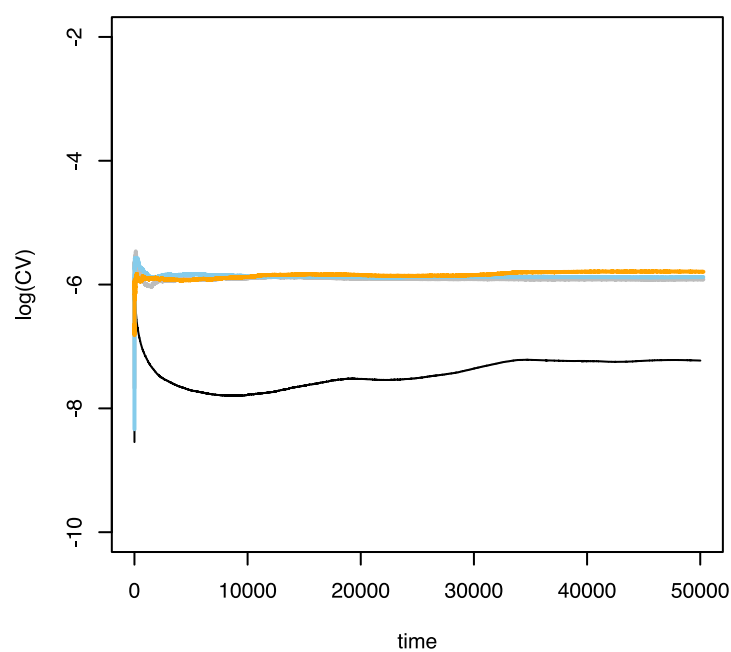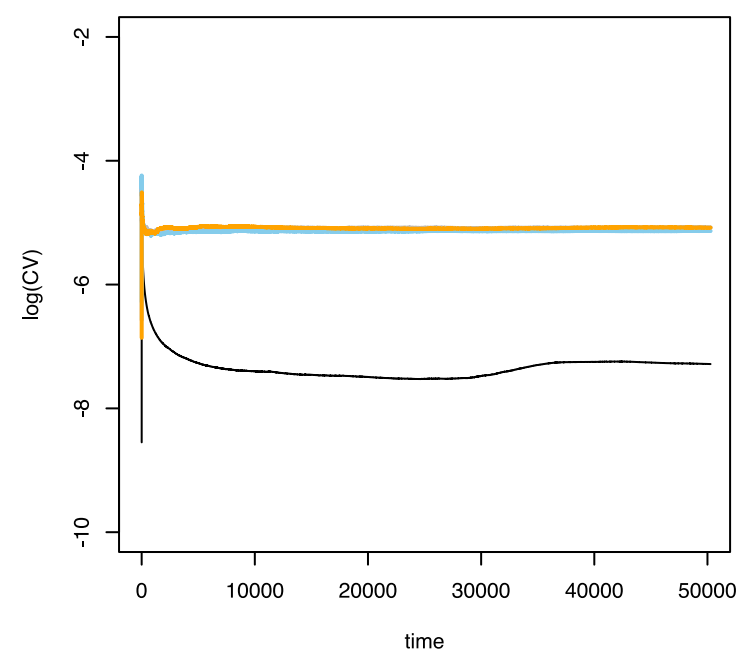

$\Delta=4.4 \times 10^{-4}$

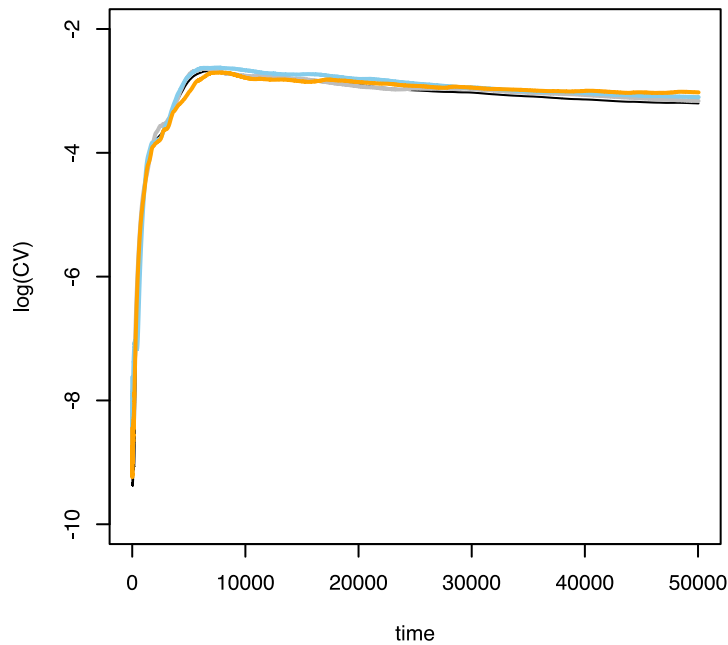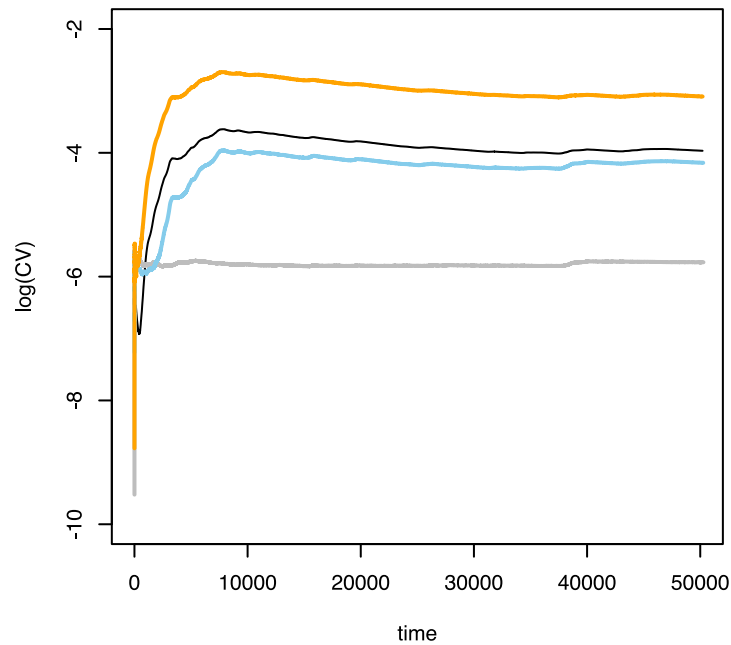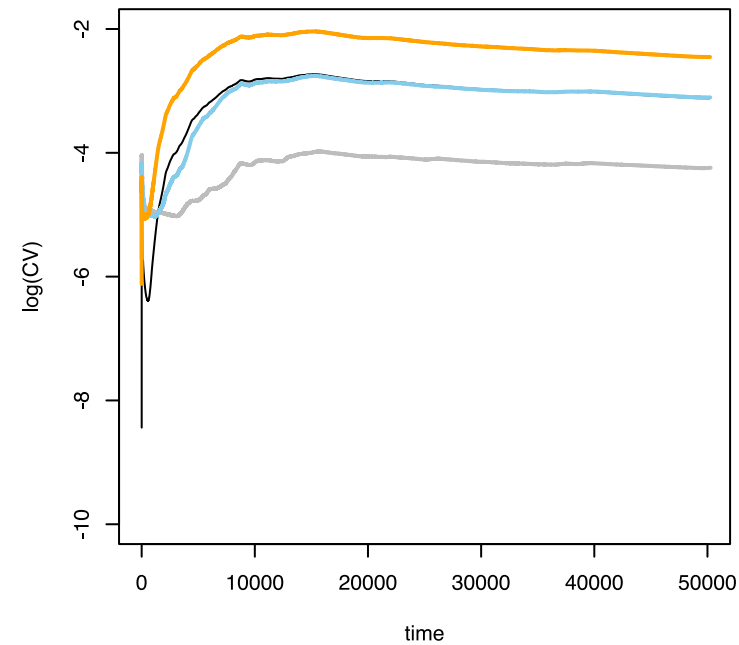

Supplement: s1 [file s1]
